# Supplementary material
Source: MDPI journal article supplement (https://www.mdpi.com/2311-553X/9/5/60)
Supplement: s1 [file s1]

|                                  | Predicted consequential pairing of target region (top) and mRNA (bottom) | Site type | Context++ score | Context++ score percentile | Weighted context++ score | Conserved branch length | P <sub>CT</sub> |
|----------------------------------|--------------------------------------------------------------------------|-----------|-----------------|----------------------------|--------------------------|-------------------------|-----------------|
| Position 40-47 of CYP24A1 3' UTR | 5' ...UAACAUCAUUCCAACUCAGGGA...<br>                                      | 8mer      | -0.46           | 98                         | -0.46                    | 3.280                   | 0.68            |
| hsa-miR-125a-5p                  | 3' AGUGUCCAUIUCCCAAGUCCCU                                                |           |                 |                            |                          |                         |                 |
| Position 40-47 of CYP24A1 3' UTR | 5' ...UAACAUCAUUCCAACUCAGGGA...<br>                                      | 8mer      | -0.43           | 98                         | -0.43                    | 3.280                   | 0.68            |
| hsa-miR-4319                     | 3' CACCGAAACAGGUCCCU                                                     |           |                 |                            |                          |                         |                 |
| Position 40-47 of CYP24A1 3' UTR | 5' ...UAACAUCAUUCCAACUCAGGGA...<br>                                      | 8mer      | -0.46           | 98                         | -0.46                    | 3.280                   | 0.68            |
| hsa-miR-125b-5p                  | 3' AGUGUCCAUIUCCCAAGUCCCU                                                |           |                 |                            |                          |                         |                 |

**2-CYP27B1**

Human CYP27B1 ENST00000228606.4 3' UTR length: 3390

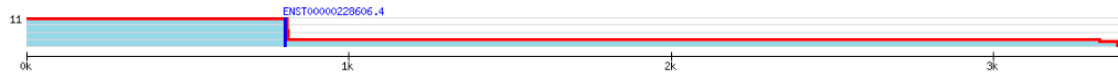

Conserved sites for miRNA families broadly conserved among vertebrates

WIK-2155-5p

[Show poorly conserved sites for miRNA families conserved among vertebrates]  
[Show conserved sites for miRNA families conserved only among mammals]  
[Show poorly conserved sites for miRNA families conserved among mammals]  
[Show sites for poorly conserved but confidently annotated miRNA families]  
[Show sites for other miRBase annotations, most of which are miRNA\* sequences or RNA fragments misannotated as miRNAs]

[\[Download SVG image of miRNA sites\]](#)  
[\[View table of miRNA sites\]](#)  
[\[View human genome browser \(hg19\)\]](#)

[\[Show all species\]](#)

**Key:**  
 Sites with higher probability of preferential conservation  
 8mer 7mer-m8 7mer-A1  
 Sites with lower probability of preferential conservation  
 8mer 7mer-m8 7mer-A1

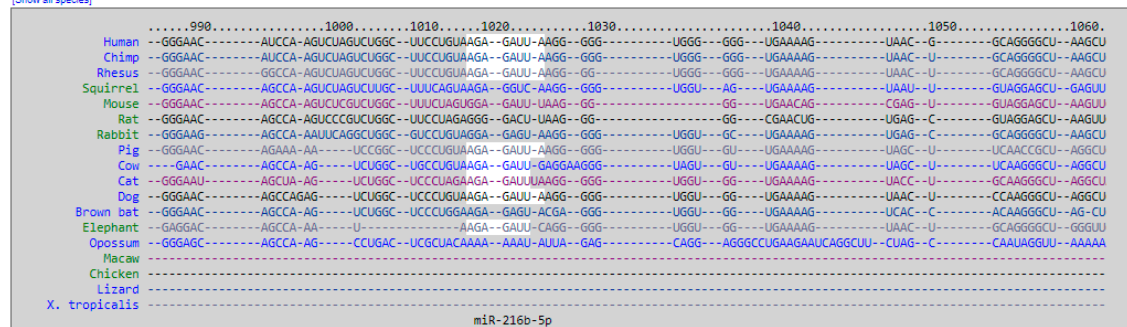

Conserved

|                                      | Predicted consequential pairing of target region (top) and miRNA (bottom) | Site type | Context++ score | Context++ score percentile | Weighted context++ score | Conserved branch length | P <sub>CT</sub> | Predicted relative K <sub>D</sub> |
|--------------------------------------|---------------------------------------------------------------------------|-----------|-----------------|----------------------------|--------------------------|-------------------------|-----------------|-----------------------------------|
| Position 1018-1025 of CYP27B1 3' UTR | 5' ...GUCUGGCUUCUGUAAGAGAUUA...<br>                                       | 8mer      | -0.03           | 54                         | -0.01                    | 1.955                   | < 0.1           | -4.141                            |
| hsa-miR-216b-5p                      | 3' AGUGUAAACGGACGUCUCUAAA                                                 |           |                 |                            |                          |                         |                 |                                   |

**Table S2.** Primers sequences for the Vitamin D metabolism genes of the related miRNAs for real-time RT-PCR analyses

| Gene Name              |              | Primer sequences 5' to 3' |
|------------------------|--------------|---------------------------|
| <b>hsa-miR-21-5p</b>   | Left primer  | GTACCACCTTGTCGGGTAGC      |
|                        | Right primer | ATGTCAGACAGCCCATCGAC      |
| <b>hsa-miR-216b-5p</b> | Left primer  | GCGAAATCTCTGCAGGCAA       |
|                        | Right primer | AGTGCAGGGTCCGAGGTATT      |
| <b>hsa-miR-125b-5p</b> | Left primer  | TCTGGAGTGTGACAATGGTGT     |
|                        | Right primer | GCCTAGCAGTAGCTGTTTAGTGT   |
| <b>hsa-miR-U6B</b>     | Left primer  | CAGCACATATACTAAAATTGGAACG |
|                        | Right primer | ACGAATTTGCGTGTCAATCC      |
| <b>CYP27B1</b>         | Left primer  | TACCAGAGCCTCCCGGAAC       |
|                        | Right primer | AACAGCGTGGACACAAACAC      |
| <b>CYP24A1</b>         | Left primer  | CCTGCTGCCAGATTCTCTGGAA    |
|                        | Right primer | TTGCCATACTTCTTGTGGTACTCC  |
| <b>RPLP0</b>           | Left primer  | CGACCTGGAAGTCCAACACTAC    |
|                        | Right primer | ATCTGCTGCATCTGCTTG        |
